# Supplementary material for: Genomic Instability Signature of Palindromic Non-Coding Somatic Mutations in Bladder Cancer
Source: MDPI journal article supplement (doi:10.3390/cancers12102882), 2020-10-08
Supplement: s1 [file s1]

Supplementary Materials

# Genomic Instability Signature of Palindromic Non-Coding Somatic Mutations in Bladder Cancer.

Sophie Vacher, Voreak Suybeng, Elodie Girard, Julien Masliah Planchon, Grégory Thomson, Constance Le Goux, Simon Garinet, Anne Schnitzler, Walid Chemlali, Virginie Firlej, Diane Damotte, Yves Allory, Maud Kamal, Géraldine Pignot and Ivan Bieche

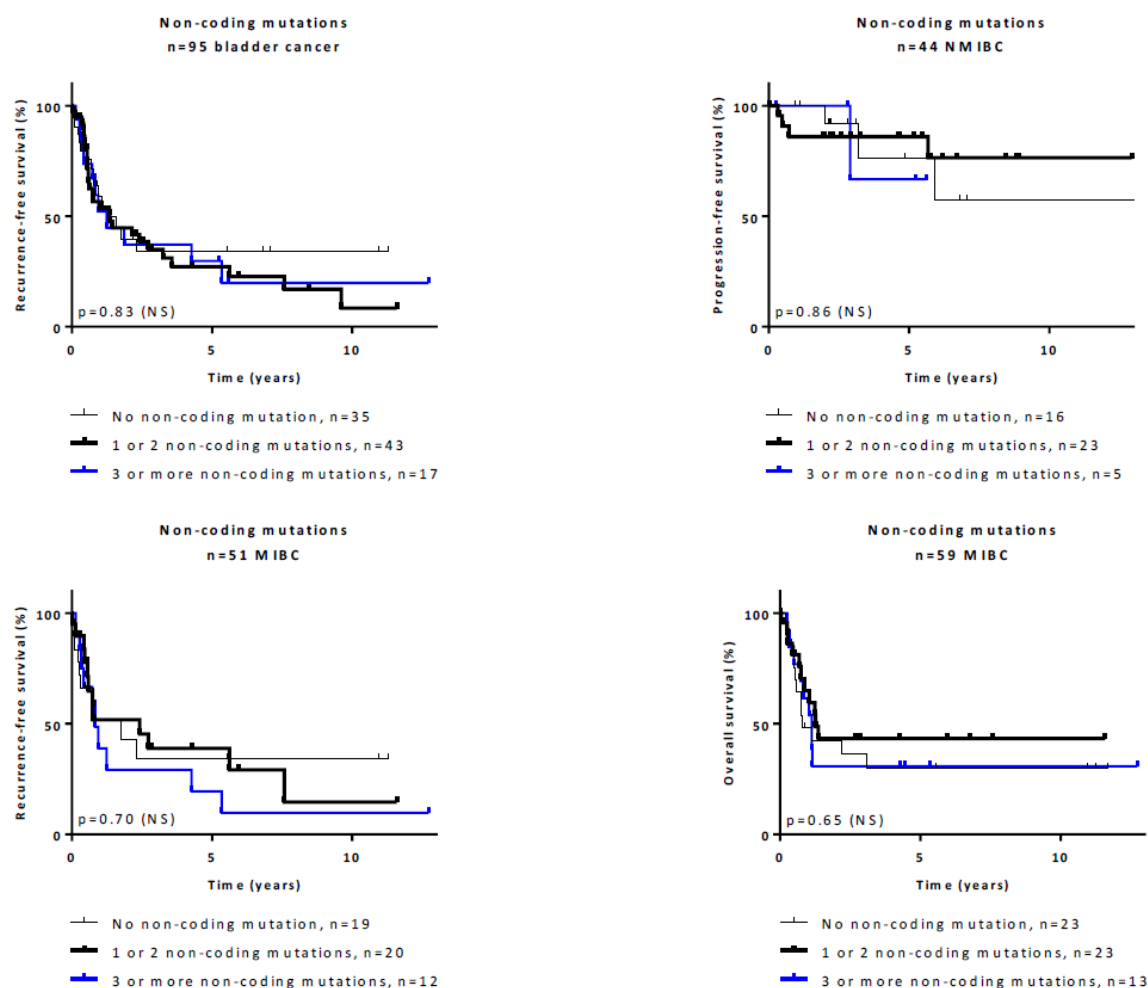

**Figure S1.** Survival curves of bladder patients according to non-coding mutation status.

**Table S1.** Primer sequences used for DNA mutation analysis.

| Name                                                          | Forward Primer (5'–3')     | Reverse Primer (5'–3')     | Product (bp) |
|---------------------------------------------------------------|----------------------------|----------------------------|--------------|
| <i>TGAACA core motif identified by Nik-Zainal et al. [13]</i> |                            |                            |              |
| GPR126                                                        | CCAGTGCATATTTACATGGACTCT   | CAGTAGAGGATGTGTCAATCCTGGA  | 134          |
| PLEKHS1                                                       | CTTCCAAGGCTGGGATGATCTA     | AAGAAAGTGCCCATACAGAAATACA  | 107          |
| Intron ADM                                                    | GTGCTTGCTGTGGGAATGATAC     | AGCAAAGTGCTAAAAAAGGAATCTGT | 150          |
| Chr7:11                                                       | TGCACTACTGTCCACTTCATCAGACT | TGGGCCAGGGTCACTCGTAT       | 186          |
| Chr15:96                                                      | GGGCTTGTTGATTTTTTCACTCATC  | CTGACTACCCGAAGCAGAAAGAAC   | 190          |
| Intron RNF169                                                 | GCCAAATTAAGGAATTTCCAGAAG   | CTGAAGGTTTTTCCCAATTAACAGA  | 177          |
| Chr7:17                                                       | GAGCAAATTTTTGTGCCACTACAC   | TTTGCACTGACCGCAGCACT       | 127          |
| Chr10:82                                                      | AGAAAGGCCAGAAGTGGGATAGA    | AGGAAACTTTTACTCTCACTCGCT   | 132          |

|                                                                           |                            |                            |     |
|---------------------------------------------------------------------------|----------------------------|----------------------------|-----|
| <b>Chr18:42</b>                                                           | CAAAAGCTGAGATGATGGTCCTG    | ATTCTTATCTCACCTGCAAAGCCT   | 123 |
| <b>Chr3:82</b>                                                            | GCTTAAAATTGGTGGCAAGT       | CCATATGGTTCTAAGATGGCTA     | 200 |
| <i>TGAACA core motif identified by in silico analysis (present study)</i> |                            |                            |     |
| <b>GABRG3</b>                                                             | TTTTGTAAAACAACAAGAAATAGTC  | GTATAATTTTGTGCAATACGTGA    | 170 |
| <b>PCDH18</b>                                                             | CAAGTTTATTGGAAAGAAGAGTA    | TGAGAGATTCTTAATATCTTGTGTA  | 92  |
| <b>EYS</b>                                                                | ATTATATTTGGTTTATGTTTACAC   | TGCTTTAATTTCTGTAGTCTGA     | 186 |
| <b>DAOA</b>                                                               | AGTACTGAAGCTCTACCAAGCTA    | GCAATGTTGCTTATTCTCGT       | 161 |
| <b>ZNF717</b>                                                             | TGAATTCCTTCTTACTCAATTACT   | AGGATCATTACCTTTCTTACAT     | 130 |
| <b>NGLY1</b>                                                              | CTTTTTTAGTATTAGACAATGTGAT  | AATTACCAAAAACATACAGAGAT    | 133 |
| <b>AP3B1</b>                                                              | GAAACTAAACCATTAGGTATTAGACA | CAGTTATATCCAAAGGCTTGAC     | 193 |
| <b>CLVS2</b>                                                              | TTCTGTATTTGGATCTCGTCT      | AAATATATGTCTCTCAAATAAAGTCT | 159 |
| <b>ZNF621</b>                                                             | TGCCATCTAAGTCCTTCATC       | TTTTCAAGTTTGAGAATCACTG     | 186 |
| <b>SCHIP1</b>                                                             | GGTTTTCTGTGCCTGGATAC       | CTGAATTCCTTTGAAACACTG      | 125 |
| <b>ARAP2</b>                                                              | CACCGTTGAAAAACAGCAG        | TCAGGCAATATTTAACCAGTAG     | 143 |
| <b>LOC100422737</b>                                                       | TAACCACATGGTTCAGACATC      | CCAATACCGGGTAACTCAG        | 136 |
| <b>KIAA1324L</b>                                                          | TATCTGTACTTTCTGTTACATACT   | TTTTGTTATACTTTGTTTCATTCA   | 178 |
| <b>DKK1</b>                                                               | TGAGGAATATTGTATTCAAATGTG   | CTACCTTCCAAATGTTGCTATG     | 181 |
| <b>RTN3</b>                                                               | GAGTATATTTTGCAGAAAGACAC    | ATAAAGTTAACACAAACTATAAGCTA | 165 |
| <b>OR7E156P</b>                                                           | GCCTATGTGTGAAGATTTTATGA    | TGGGACATATGCTTTTAATGAC     | 113 |
| <b>LOC644649</b>                                                          | CACCTTTATTGGTCTTATTAGTACA  | CAAATTTTAATGCAATTATTAAGTCT | 111 |
| <b>MIR645</b>                                                             | TGATGGAATTGCCTAGTGTGAGTCT  | GGACCTCCCCCAACTCTGCT       | 182 |
| <i>AGATCA core motif</i>                                                  |                            |                            |     |
| <b>RAD51B</b>                                                             | TGCCAGAAAAACACTTACAC       | AGATGAGGATCTCCCACAG        | 152 |

Table S2. Sequences of primers used for real-time quantitative RT-PCR.

| Gene            | Upper Primer (5' to 3') | Lower Primer (5' to 3')  | Amplicon Size (bp) |
|-----------------|-------------------------|--------------------------|--------------------|
| <i>TBP</i>      | TGCACAGGAGCCAAGAGTGAA   | CACATCACAGCTCCCCACCA     | 132                |
| <i>APOBEC3A</i> | GACAATGGCACCTCGGTCAAGA  | GGGTCCAAGTCAAAGAAGGAAC   | 137                |
| <i>APOBEC3B</i> | ATTCTTGCACCGCACGCTA     | GTCTGAAGGACCAAAGGGTCATTA | 95                 |
| <i>APOBEC3H</i> | CGAGGAAGGCCCTCTTGTGTTA  | TTCTGTCATGGCACTTTTCTTGT  | 96                 |

**Table S3.** Mutations in palindromic non-coding sites in the cohort of 103 bladder cancers.

See Excel document.

**Table S4.** Loci with a TGAACA core motif of palindromic sequences of 9-, 10- or 11-base pair (bp). The 18 loci selected are indicated in blue characters.

See Excel document.

**Table S5.** TMB, MSI status, and protein-coding gene alterations in bladder tumors showing high levels of non-coding TGAACA mutations.

| Tumor Sample | Number of non-Coding Mutations | TMB  | MSI   | Number of Non-Synonymous Variants after Filtering | Focal Amplification | Genes with Pathogenic Variants (PV) |            |                |                     |                       |               |
|--------------|--------------------------------|------|-------|---------------------------------------------------|---------------------|-------------------------------------|------------|----------------|---------------------|-----------------------|---------------|
|              |                                |      |       |                                                   |                     | Genes                               | Chromosome | Transcript     | NUCLEOTIDIC variant | proteic Variant       | Allelic Ratio |
| T331         | 8                              | 17.7 | MSI-H | 78                                                | -                   | CDKN1A                              | chr6       | NM_001291549.1 | c.424dup            | p.(Glu142GlyfsTer21)  | 73.68         |
|              |                                |      |       |                                                   |                     | TERT                                | chr5       | NA             | c.-124C>T           | NA                    | 42.52         |
|              |                                |      |       |                                                   |                     | KDM6A                               | chrX       | NM_001291415.1 | c.1973del           | p.(Asn658ThrfsTer19)  | 40.92         |
|              |                                |      |       |                                                   |                     | PTEN                                | chr10      | NM_000314.6    | c.492+2T>A          | NA                    | 25.62         |
|              |                                |      |       |                                                   |                     | RXRA                                | chr9       | NM_002957.4    | c.1280C>T           | p.(Ser427Phe)         | 25.34         |
|              |                                |      |       |                                                   |                     | ROS1                                | chr6       | NM_002944.2    | c.5027G>A           | p.(Trp1676Ter)        | 23.92         |
|              |                                |      |       |                                                   |                     | FGFR3                               | chr4       | NM_000142.4    | c.1118A>G           | p.(Tyr373Cys)         | 21.85         |
|              |                                |      |       |                                                   |                     | PIK3CA                              | chr3       | NM_006218.3    | c.1624G>A           | p.(Glu542Lys)         | 21.5          |
|              |                                |      |       |                                                   |                     | MLH1                                | chr3       | NM_000249.3    | c.958G>T            | p.(Glu320Ter)         | 20.89         |
|              |                                |      |       |                                                   |                     | FOXP1                               | chr3       | NM_032682.5    | c.1160C>G           | p.(Ser387Ter)         | 20.52         |
|              |                                |      |       |                                                   |                     | MLH1                                | chr3       | NM_000249.3    | c.2005G>T           | p.(Glu669Ter)         | 19.85         |
|              |                                |      |       |                                                   |                     | NSD1                                | chr5       | NM_022455.4    | c.1262G>A           | p.(Trp421Ter)         | 16.96         |
|              |                                |      |       |                                                   |                     | TP53                                | chr17      | NM_000546.5    | c.574C>T            | p.(Gln192Ter)         | 16.8          |
|              |                                |      |       |                                                   |                     | PIK3CA                              | chr3       | NM_006218.3    | c.277C>T            | p.(Arg93Trp)          | 16.41         |
|              |                                |      |       |                                                   |                     | PPM1D                               | chr17      | NM_003620.3    | c.859G>T            | p.(Glu287Ter)         | 15.92         |
|              |                                |      |       |                                                   |                     | TP53                                | chr17      | NM_000546.5    | c.1164_1182del      | p.(Glu388AspfsTer28)  | 13.47         |
|              |                                |      |       |                                                   |                     | KMT2A                               | chr11      | NM_005933.3    | c.2318del           | p.(Pro773ArgfsTer8)   | 5.78          |
| T254         | 8                              | 12.7 | MSS   | 65                                                | ERBB2               | KDM6A                               | chrX       | NM_001291415.1 | c.4340dup           | p.(Leu1448IlefsTer14) | 78.68         |
|              |                                |      |       |                                                   |                     | TERT                                | chr5       | NA             | c.-124C>T           | NA                    | 60.82         |
|              |                                |      |       |                                                   |                     | TP53                                | chr17      | NM_000546.5    | c.574C>T            | p.(Gln192Ter)         | 43.94         |
|              |                                |      |       |                                                   |                     | ERBB3                               | chr12      | NM_001982.3    | c.994G>A            | p.(Glu332Lys)         | 37.97         |
|              |                                |      |       |                                                   |                     | KMT2D                               | chr12      | NM_003482.3    | c.4468G>T           | p.(Glu1490Ter)        | 32.69         |
|              |                                |      |       |                                                   |                     | FOXA1                               | chr14      | NM_004496.3    | c.412_415dup        | p.(Ser139AsnfsTer89)  | 20.17         |
| T206         | 5                              | 10.4 | MSS   | 93                                                | -                   | PIK3CA                              | chr3       | NM_006218.3    | c.1633G>A           | p.(Glu545Lys)         | 62.62         |
|              |                                |      |       |                                                   |                     | ATM                                 | chr11      | NM_000051.3    | c.7308-1G>C         | NA                    | 52.12         |
|              |                                |      |       |                                                   |                     | TERT                                | chr5       | NA             | c.-146C>T           | NA                    | 45.07         |
|              |                                |      |       |                                                   |                     | FGFR3                               | chr4       | NM_000142.4    | c.1118A>G           | p.(Tyr373Cys)         | 43.56         |

|      |   |     |     |    |       |         |       |                |              |                     |       |
|------|---|-----|-----|----|-------|---------|-------|----------------|--------------|---------------------|-------|
| T238 | 4 | 7.5 | MSS | 52 | ERBB2 | ETV6    | chr12 | NM_001987.4    | c.313C>T     | p.(Arg105Ter)       | 40.43 |
|      |   |     |     |    |       | STAG2   | chrX  | NM_001042749.1 | c.2264del    | p.(Lys755ArgfsTer7) | 37.95 |
|      |   |     |     |    |       | PBRM1   | chr3  | NM_001350075.1 | c.237-1G>T   | NA                  | 8.74  |
|      |   |     |     |    |       | ARID2   | chr12 | NM_152641.3    | c.706-1G>T   | NA                  | 7.36  |
|      |   |     |     |    |       | RAD51C  | chr17 | NM_058216.2    | c.1026+1G>T  | NA                  | 5.43  |
|      |   |     |     |    |       | ERBB2   | chr17 | NM_004448.2    | c.2301C>G    | p.(Ile767Met)       | 79.77 |
|      |   |     |     |    |       | TP53    | chr17 | NM_000546.5    | c.672+1G>T   | NA                  | 38.67 |
|      |   |     |     |    |       | ASXL2   | chr2  | NM_018263.4    | c.760G>T     | p.(Glu254Ter)       | 25.0  |
|      |   |     |     |    |       | ARID1A  | chr1  | NM_006015.5    | c.5393C>G    | p.(Ser1798Ter)      | 23.53 |
|      |   |     |     |    |       | ERBB2IP | chr5  | NM_018695.3    | c.131_135del | p.(Phe44Ter)        | 18.62 |
| T272 | 0 | 5.6 | MSS | 38 | ERBB2 | NIPBL   | chr5  | NM_015384.4    | c.2509C>T    | p.(Gln837Ter)       | 15.79 |
|      |   |     |     |    |       | RB1     | chr13 | NM_000321.2    | c.1694C>A    | p.(Ser565Ter)       | 34.5  |
|      |   |     |     |    |       | TERT    | chr5  | NA             | c.-124C>T    | NA                  | 31.82 |
|      |   |     |     |    |       | TP53    | chr17 | NM_000546.5    | c.536A>G     | p.(His179Arg)       | 27.86 |

MSI: Microsatellite Instability; MSS: Microsatellite Stable; MSI-H: Microsatellite Instability High; NA: non applicable

**Table S6.** Associations between TGAACA core motif mutational signature and mRNA expression levels of immune-related genes.

| Gene                         | Gene ID | Aliases      | Group 1                 |      |       | Group 2                         |      |       | Group 3                            |      |      | p-Value *  |
|------------------------------|---------|--------------|-------------------------|------|-------|---------------------------------|------|-------|------------------------------------|------|------|------------|
|                              |         |              | No non-coding mutations |      |       | One or two non-coding mutations |      |       | Three or more non-coding mutations |      |      |            |
|                              |         |              | (n = 39)                |      |       | (n = 46)                        |      |       | (n = 18)                           |      |      |            |
| Median                       | Min     | Max          | Median                  | Min  | Max   | Median                          | Min  | Max   |                                    |      |      |            |
| Immune cell population genes |         |              |                         |      |       |                                 |      |       |                                    |      |      |            |
| CD2                          | 914     |              | 1.00                    | 0.01 | 7.47  | 0.56                            | 0.06 | 6.81  | 0.67                               | 0.16 | 2.33 | 0.39 (NS)  |
| CD3E                         | 916     |              | 1.00                    | 0.08 | 9.68  | 0.65                            | 0.06 | 7.19  | 0.87                               | 0.15 | 2.78 | 0.23 (NS)  |
| CD4                          | 920     |              | 1.00                    | 0.17 | 5.36  | 0.73                            | 0.11 | 4.11  | 0.99                               | 0.13 | 1.97 | 0.11 (NS)  |
| CD8A                         | 925     |              | 1.00                    | 0.05 | 29.1  | 0.65                            | 0.07 | 13.5  | 1.22                               | 0.15 | 8.95 | 0.68 (NS)  |
| CTLA4                        | 1493    |              | 1.00                    | 0.00 | 8.63  | 0.58                            | 0.00 | 5.65  | 1.27                               | 0.08 | 3.10 | 0.32 (NS)  |
| FOXP3                        | 50943   |              | 1.00                    | 0.12 | 6.67  | 0.78                            | 0.08 | 5.64  | 0.94                               | 0.07 | 3.43 | 0.22 (NS)  |
| XCR1                         | 2829    |              | 1.00                    | 0.09 | 10.8  | 0.73                            | 0.05 | 14.2  | 0.97                               | 0.00 | 15.3 | 0.15 (NS)  |
| MERTK                        | 10461   |              | 1.00                    | 0.24 | 3.55  | 1.07                            | 0.27 | 2.41  | 0.98                               | 0.14 | 3.11 | 0.90 (NS)  |
| PTPRC                        | 5788    | CD45         | 1.00                    | 0.02 | 7.18  | 0.58                            | 0.02 | 6.14  | 0.97                               | 0.13 | 2.47 | 0.19 (NS)  |
| MS4A1                        | 931     | CD20         | 1.00                    | 0.00 | 28.6  | 0.43                            | 0.00 | 39.9  | 1.45                               | 0.00 | 25.2 | 0.79 (NS)  |
| NCAM1                        | 4684    | CD56         | 1.00                    | 0.00 | 108.4 | 1.11                            | 0.00 | 47.3  | 1.41                               | 0.22 | 64.4 | 0.84 (NS)  |
| PDGFRB                       | 5159    |              | 1.00                    | 0.07 | 7.29  | 0.50                            | 0.08 | 6.42  | 0.87                               | 0.07 | 3.23 | 0.17 (NS)  |
| PECAM1                       | 5175    |              | 1.00                    | 0.14 | 6.14  | 0.66                            | 0.10 | 2.83  | 0.83                               | 0.19 | 2.74 | 0.14 (NS)  |
| T cell activation genes      |         |              |                         |      |       |                                 |      |       |                                    |      |      |            |
| PRF1                         | 5551    |              | 1.00                    | 0.09 | 16.8  | 0.47                            | 0.05 | 10.4  | 0.83                               | 0.10 | 3.08 | 0.34 (NS)  |
| GZMA                         | 3001    |              | 1.00                    | 0.03 | 31.7  | 0.43                            | 0.01 | 9.42  | 1.03                               | 0.12 | 4.65 | 0.11 (NS)  |
| GZMB                         | 3002    |              | 1.00                    | 0.01 | 40.8  | 0.41                            | 0.02 | 20.1  | 1.51                               | 0.02 | 11.1 | 0.38 (NS)  |
| Checkpoint T cell genes      |         |              |                         |      |       |                                 |      |       |                                    |      |      |            |
| CD28                         | 940     |              | 1.00                    | 0.01 | 5.45  | 0.64                            | 0.02 | 4.89  | 0.87                               | 0.08 | 1.61 | 0.062 (NS) |
| ENTPD1                       | 953     | CD39         | 1.00                    | 0.10 | 4.13  | 0.66                            | 0.10 | 3.55  | 0.75                               | 0.12 | 2.32 | 0.28 (NS)  |
| NT5E                         | 4907    | CD73         | 1.00                    | 0.05 | 8.6   | 0.55                            | 0.06 | 4.58  | 0.39                               | 0.16 | 6.06 | 0.061 (NS) |
| CD96                         | 10225   |              | 1.00                    | 0.07 | 4.88  | 0.82                            | 0.06 | 3.21  | 0.78                               | 0.03 | 5.67 | 0.76 (NS)  |
| TIGIT                        | 201633  |              | 1.00                    | 0.07 | 12.1  | 0.74                            | 0.06 | 8.35  | 1.64                               | 0.13 | 3.62 | 0.40 (NS)  |
| CD226                        | 10666   |              | 1.00                    | 0.02 | 5.13  | 0.46                            | 0.04 | 3.18  | 0.70                               | 0.10 | 2.32 | 0.081 (NS) |
| TNFRSF14                     | 8764    |              | 1.00                    | 0.35 | 3.06  | 0.94                            | 0.24 | 1.87  | 0.81                               | 0.07 | 2.31 | 0.23 (NS)  |
| TNFRSF18                     | 8784    | GITR         | 1.00                    | 0.09 | 8.99  | 1.01                            | 0.03 | 11.33 | 0.86                               | 0.03 | 2.79 | 0.61 (NS)  |
| TNFRSF4                      | 7293    | OX40, CD134  | 1.00                    | 0.09 | 8.03  | 0.66                            | 0.08 | 4.24  | 1.22                               | 0.17 | 3.00 | 0.37 (NS)  |
| CD27                         | 939     | TNFRSF7      | 1.00                    | 0.00 | 17.4  | 0.68                            | 0.00 | 10.7  | 1.14                               | 0.10 | 5.02 | 0.44 (NS)  |
| TNFRSF9                      | 3604    | CD137, 4-1BB | 1.00                    | 0.00 | 13.7  | 0.81                            | 0.00 | 16.75 | 1.37                               | 0.12 | 5.25 | 0.59 (NS)  |
| HAVCR2                       | 84868   | TIM3         | 1.00                    | 0.08 | 14.2  | 0.67                            | 0.05 | 7.03  | 1.04                               | 0.11 | 6.17 | 0.31 (NS)  |
| ICOS                         | 29851   |              | 1.00                    | 0.00 | 8.44  | 0.50                            | 0.02 | 5.36  | 0.80                               | 0.10 | 1.74 | 0.15 (NS)  |
| LAG3                         | 3902    |              | 1.00                    | 0.04 | 64.8  | 0.95                            | 0.04 | 19.39 | 1.17                               | 0.08 | 14.4 | 0.94 (NS)  |
| PDCD1                        | 5133    |              | 1.00                    | 0.00 | 9.75  | 0.66                            | 0.00 | 10.64 | 1.25                               | 0.13 | 4.04 | 0.66 (NS)  |
| Checkpoint tumor cell genes  |         |              |                         |      |       |                                 |      |       |                                    |      |      |            |
| IDO1                         | 3620    |              | 1.00                    | 0.05 | 109.3 | 0.89                            | 0.03 | 121.8 | 1.52                               | 0.08 | 78.9 | 0.93 (NS)  |
| CD80                         | 941     | B7-1         | 1.00                    | 0.00 | 25.2  | 0.73                            | 0.03 | 5.55  | 1.45                               | 0.09 | 9.01 | 0.56 (NS)  |
| CD86                         | 942     | B7-2         | 1.00                    | 0.07 | 9.99  | 0.80                            | 0.07 | 6.02  | 1.36                               | 0.27 | 5.76 | 0.55 (NS)  |
| CD276                        | 80381   | B7-H3        | 1.00                    | 0.44 | 3.14  | 1.00                            | 0.32 | 3.20  | 1.30                               | 0.49 | 5.01 | 0.82 (NS)  |
| LGALS9                       | 3965    | LGALS9       | 1.00                    | 0.07 | 7.68  | 1.10                            | 0.16 | 5.66  | 1.34                               | 0.10 | 2.29 | 0.48 (NS)  |
| CD274                        | 29126   | PDL1         | 1.00                    | 0.05 | 24.1  | 0.89                            | 0.06 | 18.1  | 1.49                               | 0.09 | 7.78 | 0.84 (NS)  |
| PDCD1LG2                     | 80380   |              | 1.00                    | 0.03 | 17.2  | 0.58                            | 0.04 | 17.7  | 1.15                               | 0.10 | 4.17 | 0.30 (NS)  |
| ICOSLG                       | 23308   |              | 1.00                    | 0.20 | 3.31  | 0.80                            | 0.18 | 3.55  | 1.29                               | 0.39 | 4.81 | 0.22 (NS)  |
| PVR                          | 5817    | CD155        | 1.00                    | 0.26 | 3.00  | 0.93                            | 0.00 | 3.40  | 0.99                               | 0.23 | 3.01 | 0.78 (NS)  |
| PVRIG                        | 79037   | CD112R       | 1.00                    | 0.21 | 6.71  | 0.56                            | 0.21 | 5.05  | 0.96                               | 0.25 | 4.06 | 0.15 (NS)  |
| TNFSF4                       | 7292    | OX40L        | 1.00                    | 0.00 | 44.0  | 1.42                            | 0.09 | 27.9  | 4.66                               | 0.00 | 39.2 | 0.75 (NS)  |
| Interferon inducible genes   |         |              |                         |      |       |                                 |      |       |                                    |      |      |            |
| CXCL10                       | 3627    |              | 1.00                    | 0.02 | 269.9 | 1.20                            | 0.02 | 85.7  | 2.60                               | 0.04 | 44.6 | 0.69 (NS)  |
| RSAD2                        | 91543   |              | 1.00                    | 0.24 | 42.0  | 3.21                            | 0.11 | 22.5  | 3.48                               | 0.31 | 87.7 | 0.044      |
| IFI44L                       | 10964   |              | 1.00                    | 0.04 | 31.2  | 1.91                            | 0.04 | 21.3  | 1.67                               | 0.07 | 33.6 | 0.15 (NS)  |
| IFI6                         | 2537    |              | 1.00                    | 0.11 | 16.6  | 1.96                            | 0.05 | 16.5  | 1.90                               | 0.19 | 47.0 | 0.045      |
| IFIT1                        | 3434    |              | 1.00                    | 0.11 | 18.1  | 1.16                            | 0.08 | 15.8  | 1.03                               | 0.09 | 39.1 | 0.26 (NS)  |
| IRF8                         | 3394    |              | 1.00                    | 0.06 | 7.88  | 0.82                            | 0.02 | 6.47  | 1.23                               | 0.15 | 3.04 | 0.37 (NS)  |
| MX1                          | 4599    |              | 1.00                    | 0.12 | 15.5  | 1.52                            | 0.18 | 17.4  | 1.14                               | 0.11 | 30.1 | 0.21 (NS)  |
| OAS1                         | 4938    |              | 1.00                    | 0.13 | 4.16  | 1.27                            | 0.36 | 9.48  | 1.47                               | 0.02 | 5.24 | 0.035      |

|                                               |      |                |             |      |      |             |      |      |             |      |      |              |
|-----------------------------------------------|------|----------------|-------------|------|------|-------------|------|------|-------------|------|------|--------------|
| <i>IFI27</i>                                  | 3429 |                | <b>1.00</b> | 0.10 | 34.1 | <b>3.64</b> | 0.12 | 50.1 | <b>1.03</b> | 0.24 | 26.6 | <b>0.015</b> |
| <i>G1P2</i>                                   | 9636 | <i>ISG15</i>   | <b>1.00</b> | 0.12 | 11.9 | <b>1.53</b> | 0.09 | 7.78 | <b>1.75</b> | 0.18 | 27.3 | <b>0.025</b> |
| <b>Major histocompatibility complex genes</b> |      |                |             |      |      |             |      |      |             |      |      |              |
| <i>HLA-A</i>                                  | 3105 |                | <b>1.00</b> | 0.14 | 7.81 | <b>0.98</b> | 0.03 | 5.85 | <b>0.91</b> | 0.25 | 6.66 | 0.32 (NS)    |
| <i>HLA-B</i>                                  | 3106 |                | <b>1.00</b> | 0.12 | 36.1 | <b>1.07</b> | 0.12 | 13.4 | <b>0.73</b> | 0.12 | 13.9 | 0.52 (NS)    |
| <i>HLA-C</i>                                  | 3107 |                | <b>1.00</b> | 0.00 | 5.25 | <b>0.38</b> | 0.00 | 4.85 | <b>0.12</b> | 0.00 | 8.23 | 0.48 (NS)    |
| <i>HLA-DRA</i>                                | 3122 |                | <b>1.00</b> | 0.02 | 7.09 | <b>0.50</b> | 0.02 | 4.98 | <b>0.82</b> | 0.10 | 3.07 | 0.14 (NS)    |
| <i>HLA-DRB1</i>                               | 3123 | <i>HLA-DRB</i> | <b>1.00</b> | 0.08 | 6.16 | <b>0.65</b> | 0.02 | 5.36 | <b>0.88</b> | 0.11 | 3.71 | 0.37 (NS)    |

---

\* Mann-Whitney test (no *vs.* 1 or more non-coding mutations).

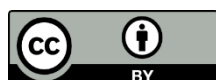

© 2020 by the authors. Licensee MDPI, Basel, Switzerland. This article is an open access article distributed under the terms and conditions of the Creative Commons Attribution (CC BY) license (<http://creativecommons.org/licenses/by/4.0/>).
